# Supplementary material for: Effects of metal organic framework Fe-BTC on the thermal decomposition of ammonium perchlorate
Source: Royal Society of Chemistry journal article supplement (doi:10.1039/c6ra12634k), 2016-01-01
Supplement: c6ra12634k1.pdf [file c6ra12634k1.pdf]

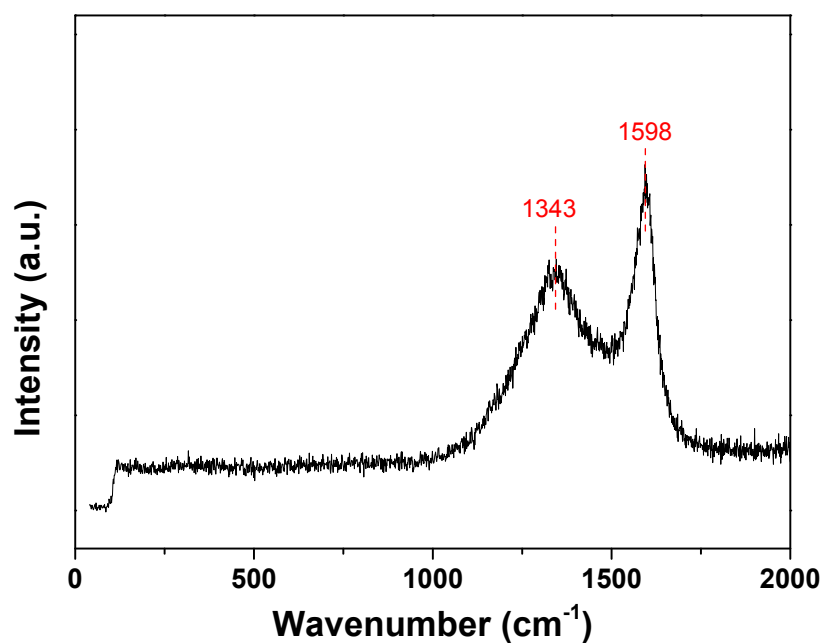

Fig. S1 Raman spectrum of the decomposition product of Fe-BTC

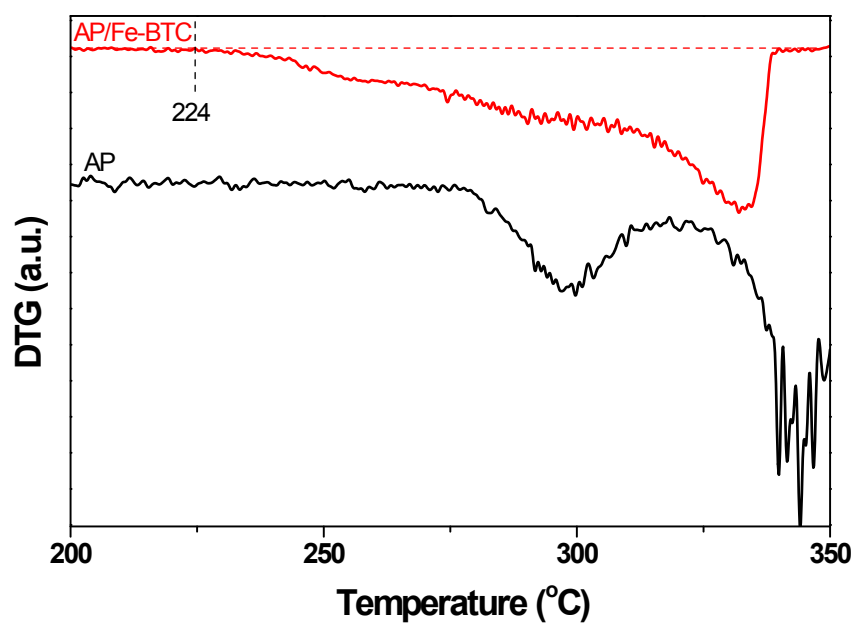

Fig.S2 Enlarged view of the DTG curves of AP with and without Fe-BTC
